1                   The nidogen-domain containing protein DEX-1 is required for epidermal  
2                                           remodeling in *C. elegans* dauers

3                   Kristen M. Flatt<sup>\*</sup>, Caroline Beshers, Cagla Unal, Nathan E. Schroeder<sup>\*‡1</sup>

4                   <sup>\*</sup>Program in Neuroscience, University of Illinois at Urbana-Champaign, Urbana,  
5                   IL, 61801

6                   <sup>‡</sup>Department of Crop Sciences, University of Illinois at Urbana-Champaign,  
7                   Urbana, IL, 61801

8                   <sup>1</sup>Corresponding author: Department of Crop Sciences, 1102 S. Goodwin Ave.,  
9                   University of Illinois at Urbana-Champaign, Urbana, IL, 61801. E-mail:  
10                   [nes@illinois.edu](mailto:nes@illinois.edu)

11

1           Short running title: DEX-1 in *C. elegans* dauer remodeling

2           Key words: polyphenism, cuticlin, SNED1, tectorin, DYF-7, extracellular matrix,

3 *ajm-1::gfp*

4           Corresponding author: Nathan E. Schroeder, Dept. of Crop Sciences, University

5 of Illinois at Urbana-Champaign, Urbana, IL, 61801, USA, Ph: 217-244-6128, E-mail:

6 nes@illinois.edu

7

8

## 1 **Abstract**

2 Phenotypic plasticity is a critical component of an organism's ability to thrive in an ever-  
3 changing environment. The free-living nematode, *Caenorhabditis elegans*, adapts to  
4 unfavorable environmental conditions by pausing reproductive development and  
5 entering a stress-resistant larval stage known as dauer. The transition into dauer is  
6 marked by vast morphological changes – including remodeling of epidermis, neurons  
7 and muscle. Though many of these dauer-specific traits have been described, the  
8 molecular basis of dauer-specific remodeling is still poorly understood. Here we show  
9 that the nidogen-domain containing protein DEX-1 functions downstream of the dauer  
10 decision to facilitate stage-specific tissue remodeling during dauer morphogenesis.  
11 DEX-1 was previously shown to regulate sensory dendrite formation during  
12 embryogenesis. We find that DEX-1 is also required for the proper remodeling of the  
13 stem cell-like epidermal seam cells and maintenance of seam cell quiescence during  
14 dauer. *dex-1* mutant dauers lack distinct lateral cuticular alae during dauer and have  
15 increased sensitivity to sodium dodecyl sulfate (SDS). Furthermore, we find that DEX-1  
16 mediated seam cell remodeling is required for proper dauer mobility. We show that  
17 DEX-1 acts cell autonomously in the seam cells during dauer and that *dex-1* expression  
18 during dauer is regulated through DAF-16/FOXO-mediated derepression. Finally, we  
19 show that *dex-1* interacts with a family of zona pellucida-domain encoding genes to  
20 regulate dauer-specific epidermal remodeling. Taken together, our data indicates that  
21 DEX-1 plays a central role in *C. elegans* epidermal remodeling during dauer.

## 22 **Introduction**

1 In order to survive changing environments, organisms modify their phenotype (i.e.  
2 phenotypic plasticity). Tissue remodeling is an important component of stress-induced  
3 phenotypic plasticity. For example, desert locusts are capable of altering their  
4 morphology between distinct 'gregarious' and 'solitarious' phases based on population  
5 density (Pener and Simpson 2009), and certain species of butterfly also change their  
6 body morphology and wing color based on seasonal cues (Windig 1994). While these  
7 large-scale displays of phenotypic plasticity are readily observed, the molecular basis of  
8 tissue remodeling in response to environmental inputs is often unclear.

9 *C. elegans* is a useful animal to investigate the molecular mechanisms that facilitate  
10 stress-induced remodeling. Under favorable growth conditions, *C. elegans* develops  
11 continuously through four larval stages (L1-L4) into a reproductive adult. However,  
12 under unfavorable environmental conditions, *C. elegans* larvae arrest their development  
13 at the second larval molt and enter the stress-resistant dauer stage (Cassada and  
14 Russell 1975; Golden and Riddle 1984). Dauers are specialized, non-feeding larvae  
15 capable of withstanding extended periods of adverse environmental conditions. Dauer-  
16 specific stress resistance is likely facilitated by several morphological changes that  
17 occur during dauer formation. For example, dauers display both structural and  
18 biochemical differences in their epidermis and cuticle compared with non-dauers (Cox  
19 *et al.* 1981; Blaxter 1993). Dauer formation also corresponds with a general radial  
20 shrinkage of the body and the formation of longitudinal cuticular ridges called alae (Fig.  
21 1A).

22 Radial shrinkage and alae formation are regulated by a set of lateral hypodermal  
23 seam cells (Singh and Sulston 1978; Melendez *et al.* 2003). Seam cell function and

1 remodeling are critical for proper dauer morphology and increased environmental  
2 resistance. The seam cells also have stem cell-like properties. During non-dauer  
3 development, the seam cells undergo asymmetrical divisions at larval molts to produce  
4 an anterior differentiated cell and a posterior seam cell. Alternatively, if the animal  
5 enters dauer diapause, the seam cells shrink and stop dividing.

6 Here, we characterize the role of DEX-1, a protein similar to mammalian tectorin and  
7 SNED1, in remodeling of the seam cells during dauer formation. DEX-1 comprises a  
8 transmembrane protein with two extracellular nidogen domains that is required for  
9 proper sensory neuron dendrite formation during embryogenesis (Heiman and Shaham  
10 2009). We find that DEX-1 is also required during dauer formation for seam cell  
11 remodeling and resistance to environmental stressors. Furthermore, we find that *dex-1*  
12 is upregulated in seam cells during dauer in a DAF-16 dependent manner. DEX-1 was  
13 previously shown to interact with a zona pellucida (ZP) domain containing protein to  
14 mediate dendrite extension. Our data suggest that DEX-1 interacts with additional ZP-  
15 domain proteins, to regulate seam cell remodeling. Finally, we implicate DEX-1 in  
16 regulating seam cell quiescence. Combined with previous data demonstrating a role for  
17 DEX-1 in sensory dendrite adhesion (Heiman and Shaham 2009), our data suggest that  
18 DEX-1 plays a role in modulating cell shape of several cell types throughout  
19 development.

## 20 **Materials and Methods**

### 21 **Strains**

1 All strains were grown under standard conditions unless otherwise noted (Brenner  
2 1974). The wild-type Bristol N2 strain and the following mutant strains were used:  
3 CHB27 *dex-1(ns42)* III; SP1735 *dyf-7(m537)* X; CB1372 *daf-7(e1372)* III; DR129 *daf-*  
4 *2(e1370) unc-32(e189)* III; DR27 *daf-16(m27)* I; FX01126 *cut-1(tm1126)* III; RB1574  
5 *cut-6(ok1919)* III; RB1629 *cut-5(ok2005)* X. *dex-1(ns42)* was given to us by Dr. Maxwell  
6 Heiman (Department of Genetics, Harvard University). *cut-1(tm1126)* was provided by  
7 the Mitani Consortium (Department of Physiology, Tokyo Women's Medical University  
8 School of Medicine, Japan). All other mutant strains were provided by the  
9 Caenorhabditis Genetics Center (CGC), which is funded by NIH Office of Research  
10 Infrastructure Programs (P40 OD010440). The following transgenic animals were also  
11 provided by the CGC: ST65 *ncls13[ajm-1::GFP]*; JR667 *wls51 [SCMp::GFP+unc-*  
12 *119(+)]*. The IL2 neurons were observed using PT2660 *myls13[klp-6p::GFP+pBx]* III  
13 (Schroeder et al., 2013); PT2762 *myls14[klp-6p::GFP +pBx]* V and JK2868 *qls56[lag-*  
14 *2p::GFP]* (Blelloch et al.; Ouellet et al. 2008; Schroeder et al. 2013).

15 The following plasmids were the generous gift of Dr. Maxwell Heiman: pMH7 *dex-*  
16 *1p::dex-1*, pMH8 *pha-4p::dex-1*, pMH111 *dex-1p(5.7kb)::gfp*, pMH125 *dex-*  
17 *1p(2.1kb)::gfp* (Heiman and Shaham 2009). Novel plasmids were constructed using  
18 Gibson Assembly (NEB, E2611S). The seam cell-specific expression plasmid was built  
19 by replacing the *dex-1* promoter from pMH7 with a 1.21kb *cut-5* promoter region (for a  
20 complete list of primers used to construct plasmids, see Table S1). The hypodermal-  
21 specific *dex-1* plasmid was constructed by replacing the *dex-1* promoter in pMH7 with  
22 the *dpy-7* promoter (Gilleard et al. 1997). The IRS sequence was deleted from pMH111  
23 using the Q5 Site Directed Mutagenesis Kit (NEB, E05525).

1 Animals containing extrachromosomal arrays were generated using standard  
2 microinjection techniques (Mello *et al.* 1991) and genotypes confirmed using PCR  
3 analysis and observation of co-injection markers. Each animal was injected with 20 $\mu$ L of  
4 plasmid and 80 $\mu$ L of *unc-122p::gfp* as the co-injection marker.

## 5 **Dauer Formation**

6 Dauers were induced by one of two methods. For non-temperature sensitive strains,  
7 we used plates containing crude dauer pheromone extracted by previously established  
8 procedures (Vowels and Thomas 1992; Schroeder and Flatt 2014). For animals with  
9 mutations in *daf-7(e1372)* or *daf-2(e1370)*, dauers were induced using the restrictive  
10 temperature of 25°C (Riddle *et al.* 1981).

## 11 **Microscopy and Rescue Analysis**

12 Animals were mounted onto 4% agarose pads and anesthetized with 1.0 mM or 0.1  
13 mM levamisole for dauers and non-dauer or partial dauers, respectively. A Zeiss  
14 Axiolmager microscope equipped with DIC and fluorescent optics was used to collect  
15 images. Images were analyzed using FIJI. For radial constriction experiments,  
16 measurement data was analyzed using a One-Way ANOVA with Bonferroni's multiple  
17 comparisons test using Graphpad Prism 6 software. The seam cell area was measured  
18 for V2pap, V2ppp and V3pap and averaged to give one measurement per animal  
19 (Sulston and Horvitz 1977).

## 20 **SDS Sensitivity Assays**

21 Sodium dodecyl sulfate (SDS) dose-response assays were performed using 12-well  
22 culture dishes with wells containing M9 buffer and specified concentrations of SDS

1 dissolved in water. Twenty dauers from each treatment were transferred into SDS.  
2 Dauer animals were exposed to SDS for 30 minutes and scored using established  
3 criteria (Liu *et al.* 2013) Briefly, animals were stimulated once with an eyelash and were  
4 scored as alive if movement was observed. Each concentration was tested in triplicate  
5 with each experiment containing a separate wild-type (N2) control. The LD<sub>50</sub> and  
6 confidence interval of each concentration was calculated using probit analysis in Minitab  
7 18.

### 8 **Fluorescent Bead Feeding Assay**

9 Feeding assays were carried out using established methods (Nika *et al.* 2016).  
10 Briefly, fluorescent beads (Sigma L3280) were added to a 10X concentrated OP50 *E.*  
11 *coli* overnight culture. Fresh NGM plates were then seeded with 65  $\mu$ L of the  
12 bead/bacteria suspension and allowed to dry. Twenty dauer or non-dauer animals were  
13 added to the plate and incubated at 20°C for 40 minutes. Worms were then observed  
14 for the presence of fluorescent beads in the intestinal tract. Each experiment was  
15 performed twice.

### 16 **Locomotion Assays**

17 Animals were transferred to unseeded NGM plates and allowed to sit at room  
18 temperature for 10 minutes before being assayed. Animals were stimulated near the  
19 anus with an eyelash and the number of body bends was scored. Counting was stopped  
20 if the animal did not complete another body bend within 5 seconds of stopping, or if the  
21 animal reversed direction. Each animal was scored twice and then removed from the  
22 plate. Counts were averaged and then analyzed using a Kruskal-Wallis test with Dunn's

1 multiple comparisons test for dauers and the Mann-Whitney U test for adult animals  
2 using Graphpad Prism 6 software.

### 3 **DEX-1 Expression Analysis**

4 The fluorescent intensities of the V2pap, V2ppp and V3pap seam cells were  
5 measured using established methods (McCloy *et al.* 2014). Briefly, each cell was  
6 outlined and the area, integrated density and mean gray value were measured.  
7 Measurements were also taken for areas without fluorescence surrounding the cell. The  
8 total corrected cell fluorescence (TCCF = integrated density - (area of selected cell \*  
9 mean fluorescence of background reading)) was then calculated for each cell. The  
10 intensities of the three cells from each worm were averaged such that each nematode  
11 comprised a single data point. The data were analyzed using One-Way ANOVA and  
12 Bonferroni's multiple comparisons test. Ten animals were measured for each genotype.

## 13 **Results**

### 14 **DEX-1 is required for proper dauer morphology and behavior.**

15 Wild-type *C. elegans* dauers have a distinctive morphology due to radial shrinkage  
16 that leads to a thin appearance compared with non-dauers (Figure 1A). We found that  
17 *dex-1(ns42)* mutants are defective in dauer radial shrinkage (Figure 1C). *dex-1* mutant  
18 dauers are significantly wider in diameter when compared to wild-type dauers, leading  
19 to a 'dumpy dauer' phenotype (Figure 1, B and C). The defect in body size appears  
20 specific to the dauer stage, as non-dauer *dex-1* mutants show no differences in body  
21 size compared with wild-type non-dauers (Figure S1). Radial shrinkage in dauers is  
22 correlated with the formation of longitudinal cuticular ridges on the lateral sides of the

1 animal called the alae (Cassada and Russell 1975). The lateral alae of *dex-1* mutant  
2 dauers are indistinct compared with wild-type dauers (Figures 1B and 2S). To confirm  
3 *dex-1* as the causative mutation, we rescued the radial shrinkage phenotype of *dex-1*  
4 mutants with *dex-1* cDNA under the control of its endogenous promoter (Figure 1C).  
5 Together, these data suggest that *dex-1* mutants form partial dauers with defects in  
6 epidermal remodeling.

7 In addition to radial shrinkage, dauers have several structural modifications compared  
8 with non-dauer animals that lead to increased resistance to environmental insults  
9 (Cassada and Russell 1975; Androwski *et al.* 2017). We characterized several dauer-  
10 specific phenotypes in *dex-1* mutants. First, we exposed dauer animals to SDS. Wild-  
11 type dauers survive for hours in 1% SDS (Cassada and Russell 1975). We found that  
12 while *dex-1* mutant dauers were sensitive to 1% SDS, they were able to survive  
13 significantly higher concentrations of SDS than wild-type non-dauer animals (Figure 1D).  
14 Similar to our radial shrinkage data, we could effectively rescue the SDS phenotype with  
15 a wild-type copy of *dex-1* (Figure 1E). Second, we used a fluorescent bead assay that  
16 determines whether feeding occurs (Nika *et al.* 2016). Non-dauers will readily ingest  
17 beads and show fluorescence throughout the digestive system. Dauers suppress  
18 pharyngeal pumping and have a buccal plug that prevents entry of fluorescent beads.  
19 We found that while fluorescence was never observed in *dex-1* mutant dauer intestines,  
20 we occasionally observed fluorescence in the buccal cavity (Figure S3). We never  
21 observed pharyngeal pumping in *dex-1* dauers. These data suggest that while  
22 pharyngeal pumping is efficiently suppressed, *dex-1* dauers have low-penetrance  
23 defects in buccal plug formation. Finally, we examined *dex-1* dauers for the presence of

1 dauer-specific gene expression of *lag-2p::gfp* in the IL2 neurons during dauer (Ouellet *et*  
2 *al.* 2008). Similar to wild-type dauers, *dex-1* dauers showed appropriate dauer-specific  
3 expression, indicating that they are indeed dauers with defects limited to epidermal  
4 remodeling (data not shown).

5 The decision to enter dauer is based on the ratio of population density to food  
6 availability (Golden and Riddle 1984). *C. elegans* constitutively secrete a pheromone  
7 mixture that is sensed by animals and, at high levels, triggers dauer formation (Golden  
8 and Riddle, 1982). Dauers can be picked from old culture plates (starved) or can be  
9 induced using purified dauer pheromone. We found no difference in the dauer  
10 phenotype between starved or pheromone-induced *dex-1* mutant dauers. The *C.*  
11 *elegans* insulin/IGF-like and TGF- $\beta$  signaling pathways function in parallel to regulate  
12 the dauer formation decision. Reduced insulin and TGF- $\beta$  signaling induced by  
13 overcrowding and scarce food promotes dauer formation. Disruption of either the  
14 insulin-receptor homolog DAF-2 or the TGF- $\beta$  homolog DAF-7 results in constitutive  
15 formation of dauers. Double mutants of *daf-2* or *daf-7* with *dex-1* did not suppress the  
16 defects in dauer morphogenesis of *dex-1*, suggesting that *dex-1* is acting downstream  
17 of the dauer decision pathway (data not shown).

## 18 **DEX-1 functions in the stem cell-like seam cells to regulate dauer morphogenesis**

19 *dex-1* is expressed at high levels during embryogenesis to regulate sensory dendrite  
20 formation (Heiman and Shaham 2009). However, previous microarray data suggested  
21 that *dex-1* is also upregulated during dauer (Liu *et al.* 2004). We generated transgenic  
22 animals expressing GFP driven by a 5.7kb 5' *dex-1* upstream promoter and observed  
23 bright fluorescence in the seam cells and glia socket cells of the anterior and posterior

1 deirid neurons starting in the pre-dauer L2 (L2d) stage. Expression of *dex-1p::gfp* in the  
2 seam cells and deirid socket cells persists throughout dauer and is downregulated upon  
3 recovery from dauer (Figure 2, A and B). We also observed weak *dex-1p::gfp*  
4 expression in unidentified pharyngeal cells during all larval stages (Figure S4).

5 Dauer-specific radial shrinkage and subsequent lateral alae formation are facilitated  
6 by shrinkage of the seam cells (Singh and Sulston, 1978; Melendez et al, 2003). Using  
7 the *ajm-1::gfp* apical junction marker (Koppen et al., 2001), we found that *dex-1* mutant  
8 dauer seam cells are larger and have jagged, rectangular edges unlike the smooth,  
9 elongated seam cells of wild type dauers (Figure 3). These data suggest that DEX-1 is  
10 required for seam cell remodeling. The seam cells also have stem cell-like properties.  
11 During non-dauer development, seam cells divide at larval molts to produce a seam cell  
12 daughter and a differentiated daughter cell (Sulston and Horvitz, 1977). During dauer,  
13 seam cells enter a quiescent state and only resume division following recovery from  
14 dauer. To determine if *dex-1* is required for maintaining seam cell quiescence during  
15 dauer, we used a seam cell nuclei marker to examine the number of seam cell nuclei in  
16 wild-type and *dex-1* backgrounds. We found that *dex-1* mutant dauers have a slight, but  
17 statistically significant, greater number of seam cell nuclei compared with wild type  
18 dauers (*dex-1*  $\bar{x}$  = 16.63  $\pm$  0.0993, WT  $\bar{x}$  = 15.95  $\pm$  0.172, p = 0.0010, n = 40). This  
19 could suggest that DEX-1 plays a role in maintaining seam cell quiescence during  
20 dauer.

21 To determine where *dex-1* acts to regulate seam cell remodeling, we expressed *dex-*  
22 *1* cDNA under the control of cell-specific promoters. First, we expressed *dex-1* in the  
23 seam cells using the *cut-5* promoter. *cut-5* was previously shown to be expressed

1 specifically in the seam cells during L1 and dauer (Sapio *et al.* 2005). Using this seam  
2 cell-specific promoter, we partially rescued SDS sensitivity in *dex-1* mutant dauers  
3 (Figure 1E). The seam cell-specific expression of *dex-1* resulted in a mosaic rescue of  
4 the radial shrinkage phenotype (Figure S5). The rescued seam cells that underwent  
5 radial constriction also displayed intact lateral alae, while the non-rescued seam cells'  
6 alae remained indistinct. Expression of *dex-1* under a pharyngeal promoter failed to  
7 rescue the *dex-1* seam cell phenotype suggesting a cell autonomous role for DEX-1. To  
8 verify the cell autonomous nature of *dex-1*, we sought to examine expression in a tissue  
9 with close contact to the seam cells. The seam cells are surrounded by a syncytial  
10 hypodermis. *dex-1* expression in the surrounding hypodermis failed to rescue the *dex-1*  
11 dauer-specific phenotype. Interestingly, expression of *dex-1* in the hypodermis induced  
12 a dumpy phenotype in approximately 33% of non-dauer animals (Fig. S6). Together,  
13 these data indicate that *dex-1* acts cell-autonomously to regulate seam cell remodeling  
14 during dauer.

### 15 **DEX-1 acts in seam cells to regulate locomotion during dauer**

16 Morphological changes during dauer are accompanied by changes in behavior.  
17 Wild-type dauer animals are general quiescent, but move rapidly when mechanically  
18 stimulated (Cassada and Russell 1975). Anecdotally, we noticed a higher percentage of  
19 quiescent *dex-1* dauers than seen with wild-type dauers. To quantify this behavior, we  
20 developed a behavioral assay that quantifies movement following mechanical  
21 stimulation (see Materials and Methods). Although both *dex-1* mutant and wild-type  
22 dauers initially respond to mechanical stimulation, the *dex-1* mutant dauers have  
23 significantly reduced locomotion and display slightly uncoordinated body movements

1 (Figure 1F and data not shown). This locomotion defect was dauer-specific, as non-  
2 dauer *dex-1* animals moved at wild-type levels following mechanical stimulation (Figure  
3 S1).

4 Given that *dex-1* was primarily expressed in the seam cells during dauer, we tested  
5 if seam cell-specific expression could rescue the behavioral phenotype. Surprisingly,  
6 seam cell-specific *dex-1* expression completely rescued the *dex-1* dauer locomotion  
7 defects (Figure 1F). In addition to seam cell remodeling, several neuron types remodel  
8 during dauer formation (Albert and Riddle 1983). For example, the IL2 and deirid  
9 sensory neurons remodel during dauer formation (Albert and Riddle 1983; Schroeder *et al.*  
10 *al.* 2013). The IL2s regulate dauer-specific behaviors (Lee *et al.* 2011; Schroeder *et al.*  
11 2013), while the deirids respond to specific mechanical cues (Sawin *et al.* 2000). We,  
12 therefore, examined these neuron classes using fluorescent reporters; however, we  
13 observed no obvious difference in the neuronal structures between *dex-1* and wild-type  
14 (data not shown).

### 15 ***dex-1* expression in dauers is regulated by DAF-16**

16 To understand how *dex-1* expression is regulated, we examined the 5' upstream  
17 region of *dex-1* for potential regulatory sites. Previous Chromatin Immunoprecipitation  
18 (ChIP-seq) data identified a putative DAF-16 binding site upstream of the *dex-1* coding  
19 region (Celniker *et al.* 2009). DAF-16 is the sole *C. elegans* ortholog of the human  
20 Forkhead BoxO-type transcription factor and a major regulator of the dauer decision. To  
21 examine whether this region affects expression of *dex-1*, we first expressed GFP from a  
22 truncated 2.1kb *dex-1* promoter. Unlike the 5.7kb *dex-1* promoter fusion, the short *dex-1*  
23 promoter drove GFP expression in the seam cells during all larval stages (Figure 2, C

1 and D). This suggests there are elements within the long promoter that repress *dex-1*  
2 expression during non-dauer stages. While mutations in *daf-16* result in animals  
3 incapable of forming dauers, under conditions of high pheromone concentrations *daf-16*  
4 mutants can enter into a partial dauer state (Vowels and Thomas 1992; Gottlieb and  
5 Ruvkun 1994). *daf-16* partial dauers are identifiable by body morphology and the  
6 presence of indistinct lateral alae (Vowels and Thomas 1992). To determine if DAF-16  
7 is regulating *dex-1* expression during dauer, we first examined the expression of the 5.7  
8 kb *dex-1p::gfp* reporter in *daf-16* partial dauers. We found that the fluorescent intensity  
9 of *dex-1p::gfp* was significantly reduced in the *daf-16* partial dauers compared to wild-  
10 type, suggesting that DAF-16 regulates *dex-1* seam cell expression during dauer  
11 (Figure 4, B-D).

12 FOXO/DAF-16 binds to canonical DAF-16 binding elements and insulin response  
13 sequences (IRS) (Paradis and Ruvkun 1998; Obsil and Obsilova 2008). Within the  
14 ChIP-seq identified region (Celniker *et al.* 2009), we identified a putative insulin  
15 response sequence (IRS) binding site (Figure 4A). To determine whether the identified  
16 DAF-16 IRS site directly regulates *dex-1* expression, we deleted the IRS sequence in  
17 the 5.7kb *dex-1* promoter region used to drive GFP. We found that deleting the IRS  
18 sequence results in reduced GFP expression in the seam cells during dauer, similar to  
19 the levels observed in *daf-16* partial dauers (Figure 4, B-E). Taken together, these  
20 results indicate that a repressor element lies within the 5.7kb promoter and that DAF-16  
21 binding to the IRS acts to derepress *dex-1* expression during dauer formation.

22 ***dex-1* interacts with genes encoding ZP-domain proteins**

1 DEX-1 interacts with the ZP-domain protein DYF-7 to regulate primary dendrite  
2 extension during embryogenesis (Heiman and Shaham 2009). We, therefore, examined  
3 the *dyf-7(m537)* mutant for defects in dauer morphogenesis. Unlike *dex-1* mutants, *dyf-*  
4 *7* mutants are defective for dauer formation under typical dauer-inducing environmental  
5 conditions (Starich *et al.* 1995). We, therefore, examined *dyf-7* mutants in dauer  
6 formation constitutive mutant backgrounds. Both *daf-2; dyf-7* and *daf-7; dyf-7* double  
7 mutants were normal for dauer-specific radial shrinkage, SDS resistance, and IL2  
8 arborization (data not shown).

9 The cuticlin (CUT) proteins are a family of ZP-domain proteins including several that  
10 are required for proper dauer morphology. Disruption of *cut-1*, *cut-5* and *cut-6* result in  
11 dauers with incomplete radial shrinkage and defective alae formation (Sebastiano *et al.*  
12 1991; Muriel *et al.* 2003; Sapio *et al.* 2005b). We asked whether these defects in CUT  
13 mutant larvae were due to seam cell remodeling. We found that, similar to *dex-1*, the  
14 seam cells of the CUT mutants were rectangular with jagged edges (Figure 5). Also  
15 similar to *dex-1*, we found that *cut-1* and *cut-5* dauers were more sensitive to SDS  
16 compared with wild type dauers (Table 1). Interestingly, while *cut-6* mutant dauers were  
17 resistant to the standard 1% SDS treatment (Muriel *et al.* 2003), we found that the *cut-6*  
18 mutant dauers were substantially more sensitive to SDS than wild-type dauers (Table  
19 1). Taken together, these data indicate similar roles for DEX-1 and cuticlins during  
20 dauer remodeling.

21 We hypothesized that, similar to its interaction with DYF-7 during embryogenesis,  
22 DEX-1 may interact with the CUT proteins during dauer. We, therefore, examined  
23 double mutants of *dex-1* with *cut-1*, *cut-5*, and *cut-6*. The *dex-1; cut-1* double mutant did

1 not enhance SDS sensitivity beyond the *dex-1* single mutant, suggesting that they may  
2 act in the same pathway to regulate dauer remodeling. The *dex-1; cut-5* double mutant  
3 was synthetically lethal during embryogenesis or early L1. This is similar to the *dex-1;*  
4 *dyf-7* double mutant (Heiman and Shaham 2009), suggesting that in addition to roles in  
5 dauer remodeling, *cut-5* and *dex-1* have redundant roles during embryogenesis.  
6 However, unlike the *dex-1; dyf-7* double mutant (Heiman and Shaham 2009), the *dex-1;*  
7 *cut-5* synthetic lethality did not display temperature sensitivity (data not shown).  
8 Interestingly, the *dex-1cut-6* double mutant was intermediate in SDS sensitivity between  
9 the *dex-1* and *cut-6* single mutants (Table 1).

10 We further tested the *cut* mutant phenotypes by generating double mutants between  
11 each of the *cut* mutants (Table 1). The *cut-1;cut-5* double mutant showed a significant  
12 reduction of SDS resistance compared to single mutants alone, suggesting that they  
13 may be acting in parallel pathways. The *cut-1;cut-6* double mutants retained the *cut-6*  
14 SDS sensitivity phenotype, suggesting that *cut-6* is epistatic to *cut-1*. The *cut-6;cut-5*  
15 dauers showed a drastic increase in sensitivity to SDS compared to the single mutants,  
16 indicating that these genes may also play roles in parallel pathways during dauer  
17 remodeling. Interestingly, the *cut-6; cut-5* double mutant showed a severe dumpy  
18 phenotype in all developmental stages. These results confirm previous work  
19 demonstrating a broad role for ZP-domain proteins in development (Heiman and  
20 Shaham 2009; Gill *et al.* 2016).

21

## 22 Discussion

1 The dauer stage of *C. elegans* is an excellent example of a polyphenism, where  
2 distinct phenotypes are produced by the same genotype via environmental regulation  
3 (Simpson *et al.* 2011). Compared to the decision to enter dauer, little is known about the  
4 molecular mechanisms controlling remodeling of dauer morphology. DEX-1 was  
5 previously characterized as a component of embryonic neuronal development (Heiman  
6 and Shaham 2009). Our data shows that DEX-1 also functions during dauer-specific  
7 remodeling of the stem cell-like seam cells. We demonstrate a cell-autonomous role for  
8 DEX-1 in the regulation of seam cell remodeling during dauer morphogenesis.

9 We found that *dex-1* is required for the shrinkage of the seam cells and formation of  
10 lateral alae during dauer. Furthermore, we found that *dex-1* dauers have significantly  
11 more seam cells than wild-type dauers, suggesting ectopic divisions during dauer  
12 diapause. In mammalian cell lines, stem cell shape regulates differentiation (McBeath *et al.*  
13 *al.* 2004; Kilian *et al.* 2010). For example, mesenchymal stem cells will differentiate into  
14 adipocytes or osteoblasts depending on whether the cell is round or flat, respectively  
15 (McBeath *et al.* 2004). We speculate that the shrinkage observed during dauer may be  
16 important for maintenance of seam cell quiescence.

17 We also found the *dex-1* mutant dauers have defects in locomotion when  
18 mechanically stimulated. We originally assumed that this could be due to the lack of  
19 lateral alae; however, our seam-cell specific rescue of *dex-1* resulted in a mosaic  
20 pattern of alae formation while having complete rescue of behavior. We, therefore,  
21 speculate that *dex-1* mutant dauers may have defects in other neuron classes that  
22 result in locomotion defects during dauer. Previous RNAi data shows that knockdown of  
23 *dex-1* results in low penetrance defects in motor neuron commissure formation (Schmitz

1 *et al.* 2007). Dauers exhibit changes in somatic muscle structure (Dixon *et al.* 2008). It  
2 will be interesting to determine if *dex-1* mutants have dauer-specific defects in  
3 neuromuscular junctions.

4 Dissection of the genetic pathways regulating the decision to enter dauer has  
5 revealed insights into TGF- $\beta$ , insulin and hormone signaling. The FOXO transcription  
6 factor, DAF-16, is a well-known regulator of the dauer formation decision by acting  
7 downstream of the insulin/IGF-1 receptor DAF-2. Dauer-inducing environmental  
8 conditions lead to a translocation of DAF-16 to the nucleus where it activates dauer  
9 formation pathways (Lee *et al.* 2001; Fielenbach and Antebi 2008). We found that *dex-1*  
10 expression during dauer is regulated by DAF-16. Based on our results we propose that  
11 DEX-1 is normally repressed during non-dauer post-embryonic stages and DAF-16  
12 serves to derepress *dex-1* expression via an upstream insulin response sequence. The  
13 *dex-1p::gfp* fluorescence was not completely eliminated in the *daf-16* partial dauers and  
14 the IRS-deletion dauers suggesting that both *dex-1* repressors and other regulatory  
15 elements remain to be identified.

16 Together with previous work (Heiman and Shaham 2009), our data suggests that  
17 DEX-1 may interact with ZP-domain proteins. While the *cut* mutants are all deletion  
18 alleles that disrupt the ZP-domains and, therefore, likely functional nulls, the sole *dex-*  
19 *1(ns42)* allele is a nonsense mutation that disrupts a region resembling mammalian  
20 zonadhesin (Heiman and Shaham 2009). It is possible that *dex-1* is a non-null and,  
21 therefore, genetic interaction experiments should be interpreted with caution. It has  
22 been proposed that biochemical compaction of the cuticlins in the extracellular space  
23 between the seam and the hypodermis causes radial constriction, and thus forms the

1 lateral alae via a ‘cuticlin tether’ (Sapio *et al.* 2005). We add to this by proposing that  
2 DEX-1 may function as a molecular binding hub for multimerized cuticlins. Our data  
3 indicate that DEX-1 acts in a cell autonomous manner within the seam cells. DEX-1  
4 includes a transmembrane domain and, therefore, may function as a transmembrane  
5 anchor while simultaneously binding the multimerized cuticlins in the extracellular space  
6 (Figure 6). Alternatively, DEX-1 could act as a secreted factor with restricted localization  
7 to the apical border of the seam cell. During embryogenesis, DEX-1 is secreted and  
8 localized to the dendritic tips (Heiman and Shaham, 2009). In both models, DEX-1 may  
9 serve to couple physical interactions between the remodeled cuticular extracellular  
10 matrix and seam cell shape (Figure 6). Failure of these tissues to properly compact and  
11 thicken due to a loss of DEX-1 could lead to an overall weakening of the cuticle and  
12 thus result in SDS sensitivity observed in *dex-1* mutant dauers. Interestingly, DEX-1 is  
13 similar to the human extracellular matrix protein SNED1 (Sushi, nidogen, and EGF-like  
14 Domain 1) that promotes invasiveness during breast cancer metastasis (Naba *et al.*  
15 2014), suggestive of a mechanical role in tissue remodeling. Previous research  
16 demonstrated a role for autophagy dauer-specific seam cell remodeling (Melendez *et al.*  
17 2003). It will be interesting to determine if dauer-specific changes to autophagy are  
18 influenced through DEX-1 mediated mechanical forces.

## 19 **Acknowledgments**

20 We thank Max Heiman for reagents and advice, and Scott Robinson at the Beckman  
21 Institute for assistance with electron microscopy. This work was supported by the  
22 National Institutes of Health (grant R01GM111566 to NES).

## 23 **Literature Cited**

- 1 Albert P. S., Riddle D. L., 1983 Developmental alterations in sensory neuroanatomy of  
2 the *Caenorhabditis elegans* dauer larva. *J. Comp. Neurol.* 219: 461–81.
- 3 Androwski R. J., Flatt K. M., Schroeder N. E., 2017 Phenotypic plasticity and  
4 remodeling in the stress-induced *Caenorhabditis elegans* dauer. *Wiley Interdiscip.*  
5 *Rev. Dev. Biol.* 6: e278.
- 6 Blaxter M. L., 1993 Cuticle surface proteins of wild type and mutant *Caenorhabditis*  
7 *elegans*. *J. Biol. Chem.* 268: 6600–9.
- 8 Belloch R., Santa Anna-Arriola S., Gao D., Li Y., Hodgkin J., *et al.*, 1999 The *gon-1*  
9 gene is required for gonadal morphogenesis in *Caenorhabditis elegans*. *Dev. Biol.*  
10 216: 382-93
- 11 Brenner S., 1974 The genetics of *Caenorhabditis elegans*. *Genetics* 77: 71–94.
- 12 Cassada R. C., Russell R. L., 1975 The dauerlarva, a post-embryonic developmental  
13 variant of the nematode *Caenorhabditis elegans*. *Dev. Biol.* 46: 326–342.
- 14 Celniker S. E., Dillon L. A. L., Gerstein M. B., Gunsalus K. C., Henikoff S., *et al.*, 2009  
15 Unlocking the secrets of the genome. *Nature* 459: 927–30.
- 16 Cox G. N., Staprans S., Edgar R. S., 1981 The cuticle of *Caenorhabditis elegans*. *Dev.*  
17 *Biol.* 86: 456–470.
- 18 Dixon S. J., Alexander M., Chan K. K. M., Roy P. J., 2008 Insulin-like signaling  
19 negatively regulates muscle arm extension through DAF-12 in *Caenorhabditis*  
20 *elegans*. *Dev. Biol.* 318: 153–161.
- 21 Fielenbach N., Antebi A., 2008 *C. elegans* dauer formation and the molecular basis of

- 1 plasticity. *Genes Dev.* 22: 2149–65.
- 2 Gill H. K., Cohen J. D., Ayala-Figueroa J., Forman-Rubinsky R., Poggioli C., *et al.*, 2016  
3 Integrity of marrow epithelial tubes in the *C. elegans* excretory system requires a  
4 transient luminal matrix. *PLOS Genet.* 12: e1006205.
- 5 Gilleard J. S., Barry J. D., Johnstone I. L., 1997 cis regulatory requirements for  
6 hypodermal cell-specific expression of the *Caenorhabditis elegans* cuticle collagen  
7 gene *dpy-7*. *Mol. Cell. Biol.* 17: 2301–11.
- 8 Golden J. W., Riddle D. L., 1982 A pheromone influences larval development in the  
9 nematode *Caenorhabditis elegans*. *Science* 218: 578–80.
- 10 Golden J. W., Riddle D. L., 1984 The *Caenorhabditis elegans* dauer larva:  
11 Developmental effects of pheromone, food, and temperature. *Dev. Biol.* 102: 368–  
12 378.
- 13 Gottlieb S., Ruvkun G., 1994 *daf-2*, *daf-16* and *daf-23*: genetically interacting genes  
14 controlling dauer formation in *Caenorhabditis elegans*. *Genetics* 137.
- 15 Heiman M. G., Shaham S., 2009 DEX-1 and DYF-7 establish sensory dendrite length  
16 by anchoring dendritic tips during cell migration. *Cell* 137: 344–355.
- 17 Kilian K. A., Bugarija B., Lahn B. T., Mrksich M., 2010 Geometric cues for directing the  
18 differentiation of mesenchymal stem cells. *Proc. Natl. Acad. Sci. U. S. A.* 107:  
19 4872–7.
- 20 Köppen M., Simske J. S., Sims P. A., Firestein B. L., Hall D. H., *et al.*, 2001 Cooperative  
21 regulation of AJM-1 controls junctional integrity in *Caenorhabditis elegans* epithelia.

- 1 Nat. Cell Biol. 3: 983–991.
- 2 Lee R. Y. N., Hench J., Ruvkun G., 2001 Regulation of *C. elegans* DAF-16 and its  
3 human ortholog FKHRL1 by the *daf-2* insulin-like signaling pathway. *Curr. Biol.* 11:  
4 1950-7
- 5 Lee H., Choi M., Lee D., Kim H., Hwang H., *et al.*, 2011 Nictation, a dispersal behavior  
6 of the nematode *Caenorhabditis elegans*, is regulated by IL2 neurons. *Nat.*  
7 *Neurosci.* 15: 107–112.
- 8 Liu T., Zimmerman K. K., Patterson G. I., 2004 Regulation of signaling genes by  
9 TGFbeta during entry into dauer diapause in *C. elegans*. *BMC Dev. Biol.* 4: 11.
- 10 Liu Z., Budiharjo A., Wang P., Shi H., Fang J., *et al.*, 2013 The highly modified microcin  
11 peptide plantazolicin is associated with nematicidal activity of *Bacillus*  
12 *amyloliquefaciens* FZB42. *Appl. Microbiol. Biotechnol.* 97: 10081–10090.
- 13 McBeath R., Pirone D. M., Nelson C. M., Bhadriraju K., Chen C. S., 2004 Cell shape,  
14 cytoskeletal tension, and RhoA regulate stem cell lineage commitment. *Dev. Cell* 6:  
15 483–95.
- 16 McCloy R. A., Rogers S., Caldon C. E., Lorca T., Castro A., *et al.*, 2014 Partial inhibition  
17 of Cdk1 in G<sub>2</sub> phase overrides the SAC and decouples mitotic events. *Cell Cycle*  
18 13: 1400–1412.
- 19 Melendez A., Talloczy Z., Seaman M., Eskelinen E.-L., Hall D. H., *et al.*, 2003  
20 Autophagy genes are essential for dauer development and life-span extension in *C.*  
21 *elegans*. *Science* (80-. ). 301: 1387–91.

- 1 Mello C. C., Kramer J. M., Stinchcomb D., Ambros V., 1991 Efficient gene transfer in  
2 *C.elegans*: extrachromosomal maintenance and integration of transforming  
3 sequences. EMBO J. 10: 3959–70.
- 4 Muriel J. M., Brannan M., Taylor K., Johnstone I. L., Lithgow G. J., *et al.*, 2003 M142.2  
5 (*cut-6*), a novel *Caenorhabditis elegans* matrix gene important for dauer body  
6 shape. Dev Biol 260: 339–351.
- 7 Naba A., Clauser K. R., Lamar J. M., Carr S. A., Hynes R. O., 2014 Extracellular matrix  
8 signatures of human mammary carcinoma identify novel metastasis promoters.  
9 Elife 3: e01308.
- 10 Nika L., Gibson T., Konkus R., Karp X., 2016 Fluorescent beads are a versatile tool for  
11 staging *Caenorhabditis elegans* in different life histories. G3  
12 Genes|Genomes|Genetics: g3.116.030163.
- 13 Obsil T., Obsilova V., 2008 Structure/function relationships underlying regulation of  
14 FOXO transcription factors. Oncogene 27: 2263–2275.
- 15 Ouellet J., Li S., Roy R., 2008 Notch signalling is required for both dauer maintenance  
16 and recovery in *C. elegans*. Development 135: 2583–92.
- 17 Paradis S., Ruvkun G., 1998 *Caenorhabditis elegans* Akt / PKB transduces insulin  
18 receptor-like signals from AGE-1 PI3 kinase to the DAF-16 transcription factor. :  
19 2488–2498.
- 20 Pener M. P., Simpson S. J., 2009 Locust phase polyphenism: An update. Adv. In Insect  
21 Phys. 36: 1–272.

- 1 Riddle D. L., Swanson M. M., Albert P. S., 1981 Interacting genes in nematode dauer  
2 larva formation. *Nature* 290: 668–671.
- 3 Sapio M. R., Hilliard M. A., Cermola M., Favre R., Bazzicalupo P., 2005 The Zona  
4 Pellucida domain containing proteins, CUT-1, CUT-3 and CUT-5, play essential  
5 roles in the development of the larval alae in *Caenorhabditis elegans*. *Dev. Biol.*  
6 282: 231–245.
- 7 Sawin E. R., Ranganathan R., Horvitz H. R., 2000 *C. elegans* locomotory rate is  
8 modulated by the environment through a dopaminergic pathway and by experience  
9 through a serotonergic pathway. *Neuron* 26: 619–31.
- 10 Schmitz C., Kinge P., Hutter H., 2007 Axon guidance genes identified in a large-scale  
11 RNAi screen using the RNAi-hypersensitive *Caenorhabditis elegans* strain nre-  
12 1(hd20) lin-15b(hd126). *Proc. Natl. Acad. Sci. U. S. A.* 104: 834–9.
- 13 Schroeder N. E., Androwski R. J., Rashid A., Lee H., Lee J., *et al.*, 2013 Dauer-specific  
14 dendrite arborization in *C. elegans* is regulated by KPC-1/furin. *Curr. Biol.* 23.
- 15 Schroeder N. E., Flatt K. M., 2014 In vivo imaging of dauer-specific neuronal remodeling  
16 in *C. elegans*. *J. Vis. Exp.*: e51834.
- 17 Sebastiano M., Lassandro F., Bazzicalupo P., 1991 *cut-1* a *Caenorhabditis elegans*  
18 gene coding for a dauer-specific noncollagenous component of the cuticle. *Dev.*  
19 *Biol.* 146: 519–530.
- 20 Simpson S. J., Sword G. A., Lo N., 2011 Polyphenism in insects. *Curr. Biol.* 21: R738–  
21 R749.

- 1 Singh R. N., Sulston J. E., 1978 Some observations on moulting in *Caenorhabditis*  
2 *elegans*. *Nematologica* 24: 63–71.
- 3 Starich T. A., Herman R. K., Kari C. K., Yeh W. H., Schackwitz W. S., *et al.*, 1995  
4 Mutations affecting the chemosensory neurons of *Caenorhabditis elegans*.  
5 *Genetics* 139: 171–88.
- 6 Sulston J. E., Horvitz H. R., 1977 Post-embryonic cell lineages of the nematode,  
7 *Caenorhabditis elegans*. *Dev. Biol.* 56: 110–156.
- 8 Vowels J. J., Thomas J. H., 1992 Genetic analysis of chemosensory control of dauer  
9 formation in *Caenorhabditis elegans*. *Genetics* 130: 105–123.
- 10 Windig J. J., 1994 Reaction norms and the genetic basis of phenotypic plasticity in the  
11 wing pattern of the butterfly *Bicyclus anynana*. *J. Evol. Biol.* 7: 665–695.

12

### 13 **Figure Legends**

14 **Figure 1. *dex-1* mutants form partial dauers.** Wild-type dauers (A) have prominent  
15 lateral alae, while *dex-1* mutant dauers' (B) alae are indistinct. Arrows point to the  
16 position of the lateral alae. Scale bar, 10 $\mu$ m. (C) *dex-1* mutant dauers are defective for  
17 dauer-specific radial shrinkage. The radial shrinkage defect can be rescued from both  
18 the endogenous *dex-1* promoter and a seam cell-specific promoter (*cut-5p::dex-1*).  
19 Error bars, SEM. Different letters above bars indicate statistically significant differences  
20 ( $\alpha = 0.05$ ,  $n = 20$ ). (D) Dose response survival assay to SDS. *dex-1* dauers are sensitive  
21 to SDS compared to wild-type dauers, but are able to survive low levels of SDS

1 exposure. Non-dauer animals are sensitive at all tested SDS concentrations (n = 60).  
2 (E) Percent survival of dauers to 0.1 % SDS. *dex-1* mutant dauer SDS sensitivity  
3 phenotype was rescued using both endogenous *dex-1* and a seam cell-specific  
4 promoter. Data was analyzed using a one proportion exact method analysis. Error bars,  
5 95% C.I. (n = 60). (G) *dex-1* mutant dauers are sluggish when mechanically stimulated.  
6 Expression of *dex-1* from the seam cells rescued the locomotion response to wild-type  
7 levels. Data were analyzed by Kruskal-Wallis test with Dunn's multiple comparisons test  
8 ( $\alpha = 0.05$ , n = 40). Error bars, SEM.

9

10 **Figure 2. The 5.7 kb upstream promoter region of *dex-1* contains dauer-specific**  
11 **regulatory elements.** Dorsoventral view of (A) dauer and lateral view of (B) non-dauer  
12 animals expressing GFP from a 5.7kb upstream promoter region of *dex-1*. Fluorescence  
13 in the seam is observed exclusively during dauer (Arrowheads indicate the seam cells).  
14 Dorsoventral view of a (C) dauer and lateral view of (D) non-dauer expressing GFP from  
15 a 2.1kb upstream promoter region. Using the short promoter, GFP expression is  
16 observed in the seam cells during all larval stages including dauer. Scale bar, 10 $\mu$ m.

17

18 **Figure 3. *dex-1* mutant dauers have defects in seam cell shrinkage.** Lateral view  
19 micrographs of (A) wild type and (B) *dex-1* dauers expressing the apical junctions  
20 marker *ncls13*[*ajm-1::gfp*]. The seam cells of wild-type dauers are elongated and  
21 smooth, while *dex-1* mutant seam cells are rectangular with jagged edges. Scale bar,  
22 10 $\mu$ m.(C) Quantification of seam cell area as measured with the *ajm-1::gfp* reporter

1 demonstrates that seam cells in *dex-1* mutant dauers are also significantly larger than in  
2 wild-type dauers. Data were analyzed by an unpaired t-test (*dex-1* dauer n = 14, WT  
3 dauer n = 15). Error bars, SEM.

4

5 **Figure 4. *dex-1* expression in the seam cells is regulated by DAF-16.** (A) We  
6 identified a putative DAF-16 IRS binding site (in all caps) ~2.8 kb upstream from the  
7 *dex-1* ATG start site. (B) Quantification and (C-E) dorsoventral view micrographs of  
8 GFP expression driven by the 5.7 kb *dex-1* promoter in dauers. Expression of GFP from  
9 the 5.7 kb *dex-1* promoter in a (C) wild-type background produces bright fluorescence  
10 in the seam cells during dauer (Also see Figure 2A). Fluorescent intensity is reduced in  
11 (D) *daf-16(m27)* partial dauer mutant background. Deletion of the DAF-16 IRS  
12 sequence (E) from the 5.7kb promoter region also significantly reduces GFP expression  
13 in the seam cells during dauer. Arrowheads indicate seam cells. Scale bar, 10 $\mu$ m.  
14 Different letters above graph indicate statistically significant differences using a One-  
15 way ANOVA with Bonferroni's multiple comparisons correction ( $\alpha = 0.05$ , n = 10). Error  
16 bars represent the SEM.

17

18 **Figure 5. Cuticlin mutants phenocopy the *dex-1* mutant seam cell phenotype**  
19 **during dauer.** Lateral view of wild-type, *dex-1* and cuticlin mutant dauers expressing  
20 the apical junctions marker *ajm-1p::GFP*. The seam cells in cuticlin mutants are jagged  
21 and rectangular, closely resembling those of *dex-1* mutant dauers. Scale bar, 10 $\mu$ m.

22

1 **Figure 6. Models of DEX-1 interaction with cuticlin proteins.** DEX-1 acts in a cell-  
2 autonomous manner along with the cuticlin proteins to facilitate alae formation. CUT-1  
3 and CUT-5 are localized to ribbons directly below the alae, while CUT-6 localizes to the  
4 edges of the lateral cuticle (Muriel et al., 2003, Sapio et al., 2005). We propose that  
5 DEX-1 acts as a molecular anchor in the seam cell membrane to interact with  
6 multimerized cuticlin proteins in the cuticle. Interactions between DEX-1 and the  
7 cuticlins leads to compaction of the seam cell. Compaction of the seam leads to the  
8 formation of dauer-specific alae. Alternatively, DEX-1 may be secreted, but highly  
9 localized to the apical membrane of the seam cell. In this model, DEX-1 functions as a  
10 binding hub by facilitating interactions between the cuticlin proteins in the extracellular  
11 space.

**TABLE 1**  
**SDS concentration necessary to kill 50% of animals tested for each genotype.**

| STRAIN               | LD <sub>50</sub> <sup>a</sup> |
|----------------------|-------------------------------|
| WT dauer             | >10% ± ---                    |
| WT L3                | <0.01 ± ---                   |
| <i>dex-1(ns42)</i>   | 0.15 ± 0.03                   |
| <i>cut-1(tm1126)</i> | 0.28 ± 0.05                   |
| <i>cut-6(ok1919)</i> | 2.02 ± 0.15                   |
| <i>cut-5(ok2005)</i> | 0.25 ± 0.06                   |
| <i>cut-1;dex-1</i>   | 0.20 ± 0.03                   |
| <i>dex-1;cut-6</i>   | 0.56 ± 0.29                   |
| <i>dex-1;cut-5</i>   | --- <sup>b</sup>              |
| <i>cut-1;cut-5</i>   | 0.08 ± 0.02                   |
| <i>cut-1;cut-6</i>   | 1.85 ± 0.10                   |
| <i>cut-6;cut-5</i>   | 0.01 ± --- <sup>c</sup>       |

<sup>a</sup> 50% lethal dose ± 95% confidence interval

<sup>b</sup> Synthetic lethal at L1

<sup>c</sup> Synthetic dumpy at all stages

Figure 1



Figure 2



Figure 3



Figure 4



Figure 5



Figure 6
